# Supplementary material for: Construction and optimization of a microbial platform for sustainable biosynthesis of poly-N-acetyllactosamine glycoprotein in the cytoplasm for detecting tumor biomarker galectin-3
Source: Royal Society of Chemistry journal article supplement (doi:10.1039/d0gc04331a), 2021-01-01
Supplement: d0gc04331a1.pdf [file d0gc04331a1.pdf]

## Supplementary materials for

### Construction and optimization of a microbial platform for sustainable biosynthesis of poly-*N*-acetyllactosamine glycoprotein in the cytoplasm for detecting tumor biomarker galectin-3

Jian Yuan<sup>a,b</sup>, Xiaolong Jiang<sup>a,b</sup>, Huijing Zhang<sup>a,b</sup>, Jing Bai<sup>a,b</sup>, Jing Zhang<sup>c,d</sup>, Yuhui Wang<sup>a,b</sup>, Gege Lu<sup>a,b</sup>, Huimin Xu<sup>c,d</sup>, Huanhuan Liu<sup>c,d,\*</sup>, Bin Liu<sup>a,b,\*</sup>, Di Huang<sup>a,b,\*</sup>

<sup>a</sup> Key Laboratory of Molecular Microbiology and Technology, Ministry of Education, Nankai University, Tianjin, China

<sup>b</sup> TEDA Institute of Biological Sciences and Biotechnology, Tianjin Key Laboratory of Microbial Functional Genomics, Nankai University, Tianjin, China

<sup>c</sup> State Key Laboratory of Food Nutrition and Safety, Tianjin University of Science & Technology, Tianjin, China.

<sup>d</sup> Key Laboratory of Food Nutrition and Safety, Ministry of Education, Tianjin University of Science & Technology, Tianjin, China.

#### Correspondence author:

\*Address for Correspondence: TEDA Institute of Biological Sciences and Biotechnology, Nankai University, 23 Hongda Street, Tianjin Economic-Technological Development Area (TEDA), Tianjin, 300457, P R China. Tel: 86-22-6622 9592. Fax: 86-22-6622 9596. E-mail: [huangdi@nankai.edu.cn](mailto:huangdi@nankai.edu.cn) or [liubin1981@nankai.edu.cn](mailto:liubin1981@nankai.edu.cn) or [lh\\_tust@tust.edu.cn](mailto:lh_tust@tust.edu.cn)

Jian Yuan and Xiaolong Jiang contributed equally to this work.

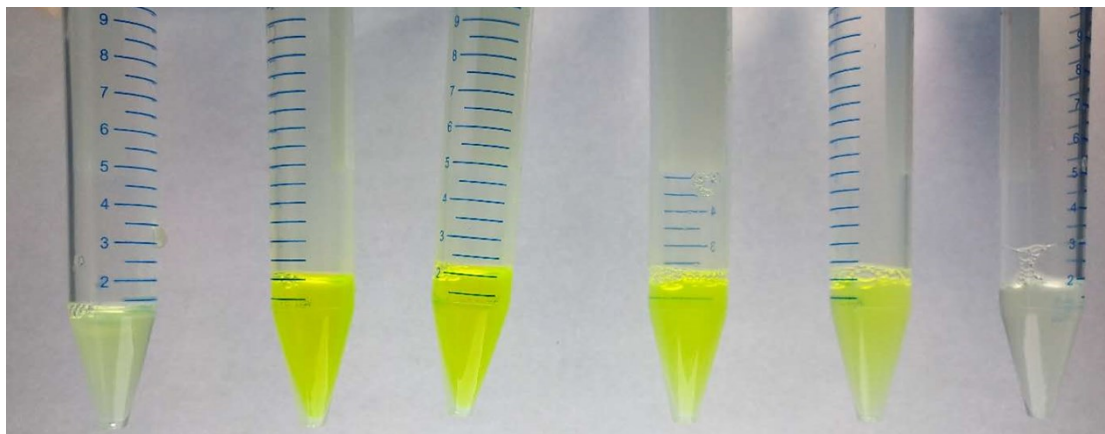

**Fig. S1 Purified glycosylated sfGFP.**

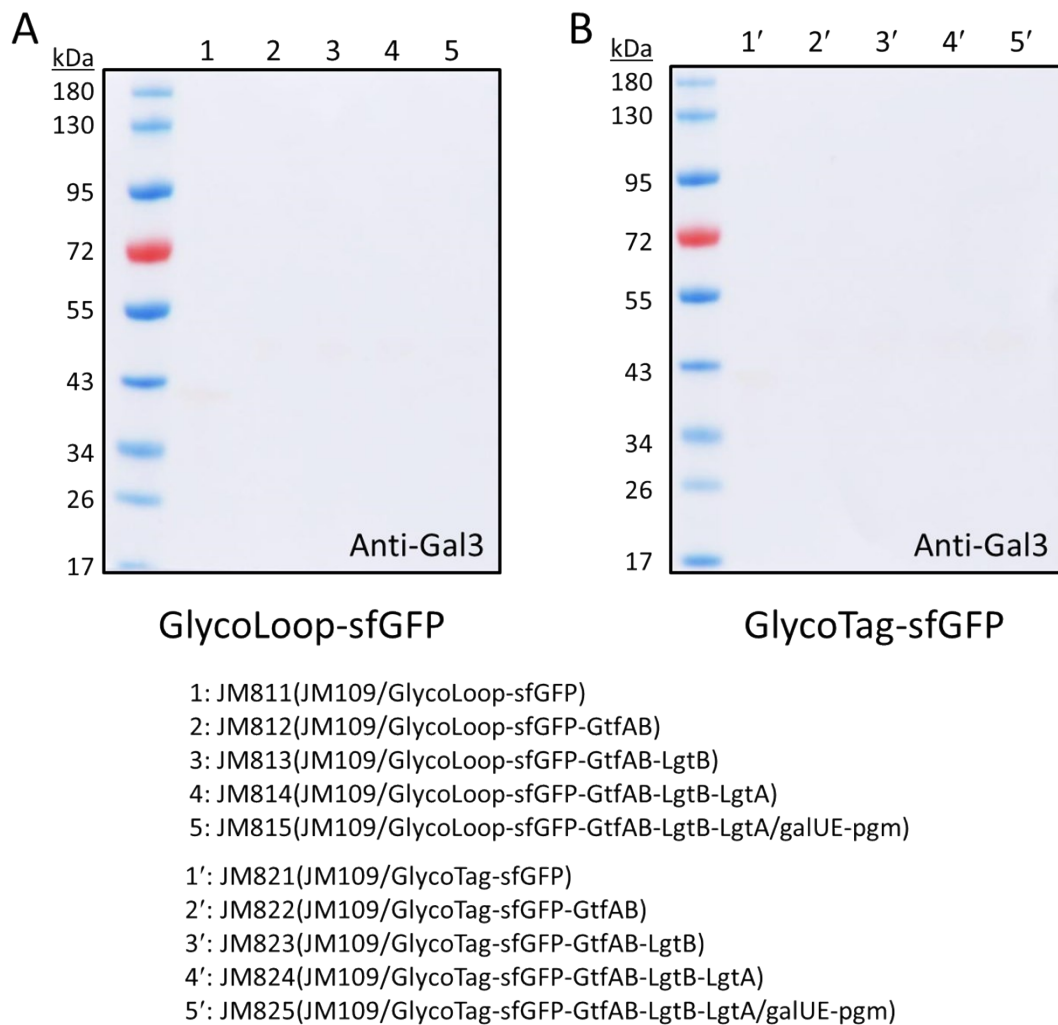

**Fig. S2 Analysis of sfGFP glycosylation with poly-LacNAc in the cytoplasm of *E. coli* JM109. Immunoblot analysis using anti-Gal3 antibody was performed to detect GlycoLoop-sfGFP glycoproteins (A) and GlycoTag-sfGFP glycoproteins (B) purified from the cytoplasm fraction of *E. coli* JM109.**

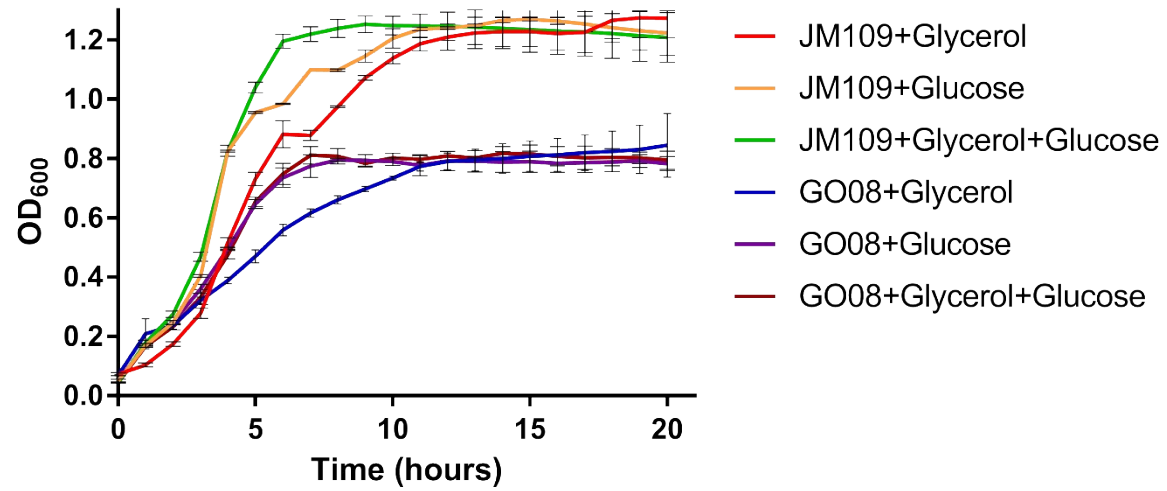

**Fig. S3 Growth profiles of *E. coli* K-12 JM109 and chassis strain GO08 cultivated in glucose or (and) glycerol M9Y medium.**

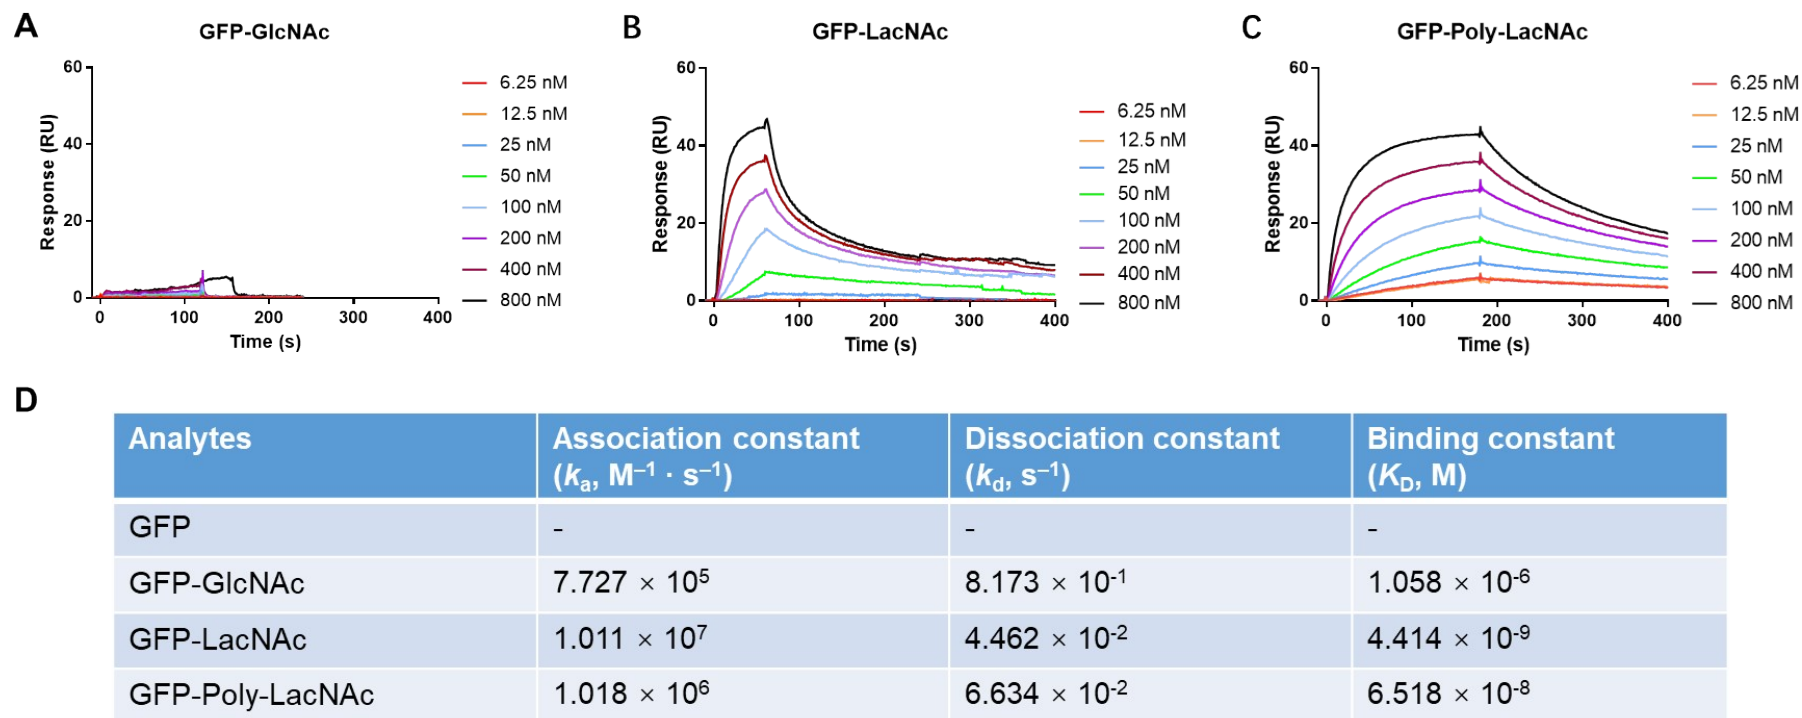

**Fig. S4 Analysis by SPR spectroscopy of the binding of glycoprotein to the galectin CGL2 immobilized on a BIAcore CM5 chip. Different concentrations (6.25, 12.5, 25, 50, 100, 200, 400 and 800 nM) of GFP-GlcNAc (A), GFP-LacNAc (B), GFP-poly-LacNAc (C) in HEPES buffered saline were injected at a flow rate of 50  $\mu$ L/min. (D) Kinetic rate constants ( $k_a$  and  $k_d$ ) were fitted using the Bivalent-Analyte binding model. The binding constant  $K_D$  was calculated by dividing  $k_d$  by  $k_a$ .**

**Table S1 Strains and plasmids used in this study.**

| Strains/Plasmids | Relevant characteristics                                                                                                                                                                                                     | Reference or source |
|------------------|------------------------------------------------------------------------------------------------------------------------------------------------------------------------------------------------------------------------------|---------------------|
| <b>Strains</b>   |                                                                                                                                                                                                                              |                     |
| DH5 $\alpha$     | F <sup>-</sup> <i>glnV44 deoR nupG purB20</i> $\Phi$ 80 <i>dlacZ</i> $\Delta$ M15 <i>\Delta(lacZYA-argF)</i> U169 <i>recA1 endA1 hsdR17(rk<sup>-</sup>, mk<sup>+</sup>) thi-1</i> <i>gyrA96 relA1</i> $\lambda$ <sup>-</sup> | Lab stock           |
| JM109            | <i>endA1 glnV44 thi-1 relA1 gyrA96 recA1 mcrB<sup>+</sup> \Delta(lac-proAB)</i> e14- [F' <i>traD36 proAB<sup>+</sup> lacIq lacZ</i> $\Delta$ M15] <i>hsdR17(rk<sup>-</sup>m<sub>K</sub><sup>+</sup>)</i>                     | Lab stock           |
| BL21(DE3)        | F <sup>-</sup> <i>ompT hsdS<sub>B</sub> (r<sub>B</sub><sup>-</sup>m<sub>B</sub><sup>-</sup>) gal dcm rne131</i> $\lambda$ (DE3)                                                                                              | Lab stock           |
| JM811            | JM109/pGlycoLoop-sfGFP                                                                                                                                                                                                       | This study          |
| JM812            | JM109/pGlycoLoop-sfGFP-GtfAB                                                                                                                                                                                                 | This study          |
| JM813            | JM109/pGlycoLoop-sfGFP-GtfAB-LgtB                                                                                                                                                                                            | This study          |
| JM814            | JM109/pGlycoLoop-sfGFP-GtfAB-LgtB-LgtA                                                                                                                                                                                       | This study          |
| JM815            | JM109/pGlycoLoop-sfGFP-GtfAB-LgtB-LgtA/pCDFm-GalU-GalE-Pgm                                                                                                                                                                   | This study          |
| JM821            | JM109/pGlycoTag-sfGFP                                                                                                                                                                                                        | This study          |
| JM822            | JM109/pGlycoTag-sfGFP-GtfAB                                                                                                                                                                                                  | This study          |
| JM823            | JM109/pGlycoTag-sfGFP-GtfAB-LgtB                                                                                                                                                                                             | This study          |
| JM824            | JM109/pGlycoTag-sfGFP-GtfAB-LgtB-LgtA                                                                                                                                                                                        | This study          |
| JM825            | JM109/pGlycoTag-sfGFP-GtfAB-LgtB-LgtA/pCDFm-GalU-GalE-Pgm                                                                                                                                                                    | This study          |
| GO01             | JM109 $\Delta$ <i>lacIZYA</i>                                                                                                                                                                                                | This study          |
| GO02             | JM109 $\Delta$ <i>lacIZYA</i> $\Delta$ <i>zwf</i>                                                                                                                                                                            | This study          |
| GO03             | JM109 $\Delta$ <i>lacIZYA</i> $\Delta$ <i>zwf</i> $\Delta$ <i>pfkB</i>                                                                                                                                                       | This study          |
| GO04             | JM109 $\Delta$ <i>lacIZYA</i> $\Delta$ <i>zwf</i> $\Delta$ <i>pfkB</i> $\Delta$ <i>pfkA</i>                                                                                                                                  | This study          |

|                  |                                                                                                                                            |            |
|------------------|--------------------------------------------------------------------------------------------------------------------------------------------|------------|
| GO05             | JM109 $\Delta lacIZYA \Delta zwf \Delta pfkB \Delta pfkA \Delta pykF$                                                                      | This study |
| GO06             | JM109 $\Delta lacIZYA \Delta zwf \Delta pfkB \Delta pfkA \Delta pykF \Delta pykA$                                                          | This study |
| GO07             | JM109 $\Delta lacIZYA \Delta zwf \Delta pfkB \Delta pfkA \Delta pykF \Delta pykA \Delta gldA$                                              | This study |
| GO08             | JM109 $\Delta lacIZYA \Delta zwf \Delta pfkB \Delta pfkA \Delta pykF \Delta pykA \Delta gldA \Delta nagB$                                  | This study |
| GO811            | GO08/pGlycoLoop-sfGFP                                                                                                                      | This study |
| GO812            | GO08/pGlycoLoop-sfGFP-GtfAB                                                                                                                | This study |
| GO813            | GO08/pGlycoLoop-sfGFP-GtfAB-LgtB                                                                                                           | This study |
| GO814            | GO08/pGlycoLoop-sfGFP-GtfAB-LgtB-LgtA                                                                                                      | This study |
| GO815            | GO08/pGlycoLoop-sfGFP-GtfAB-LgtB-LgtA/pCDFm-GalU-GalE-Pgm                                                                                  | This study |
| GO816            | GO08/pGlycoLoop-sfGFP-GtfAB-LgtB-LgtA/pET28m-GlmS54-GlmM-GlmU                                                                              | This study |
| GO817            | GO08/pGlycoLoop-sfGFP-GtfAB-LgtB-LgtA/pCDFm-GalU-GalE-Pgm/pET28m-GlmS54-GlmM-GlmU                                                          | This study |
| GO821            | GO08/pGlycoTag-sfGFP                                                                                                                       | This study |
| GO822            | GO08/pGlycoTag-sfGFP-GtfAB                                                                                                                 | This study |
| GO823            | GO08/pGlycoTag-sfGFP-GtfAB-LgtB                                                                                                            | This study |
| GO824            | GO08/pGlycoTag-sfGFP-GtfAB-LgtB-LgtA                                                                                                       | This study |
| <b>Plasmids</b>  |                                                                                                                                            |            |
| pACYCDuet-1      | Double T7 promoters; P15A ori Cm <sup>R</sup>                                                                                              | Novagen    |
| pCDFDuet-1       | Double T7 promoters; CloDF13 ori Spec <sup>R</sup>                                                                                         | Novagen    |
| pET28a (+)       | Single T7 promoter; ColE ori Kan <sup>R</sup>                                                                                              | Novagen    |
| pACYCm           | pACYCDuet-1 derived plasmid, the original double T <sub>7</sub> promoters were replaced by double Ptac promoters; P15A ori Cm <sup>R</sup> | This study |
| pGlycoTag-sfGFP  | pACYCm carrying codon-optimized <i>sfGFP</i> with a N terminally fused hexahistidine tag and a C terminally fused glycosylation sequence   | This study |
| pGlycoLoop-sfGFP | pACYCm carrying codon-optimized <i>sfGFP</i> with a N terminally fused hexahistidine tag and an internal loop                              | This study |

|                                  |                                                                                                                                                                                                                                                                                                                                                  |            |
|----------------------------------|--------------------------------------------------------------------------------------------------------------------------------------------------------------------------------------------------------------------------------------------------------------------------------------------------------------------------------------------------|------------|
|                                  | fused glycosylation sequence                                                                                                                                                                                                                                                                                                                     |            |
| pGlycoTag-sfGFP-GtfAB            | pACYCm carrying codon-optimized <i>sfGFP</i> with a N terminally fused hexahistidine tag and a C terminally fused glycosylation sequence, and codon-optimized <i>gtfA-gtfB</i> from <i>S. parasanguinis</i> FW213                                                                                                                                | This study |
| pGlycoLoop-sfGFP-GtfAB           | pACYCm carrying codon-optimized <i>sfGFP</i> with a N terminally fused hexahistidine tag and an internal loop fused glycosylation sequence, and codon-optimized <i>gtfA-gtfB</i> from <i>S. parasanguinis</i> FW213                                                                                                                              | This study |
| pGlycoTag-sfGFP-GtfAB-LgtB       | pACYCm carrying codon-optimized <i>sfGFP</i> with a N terminally fused hexahistidine tag and a C terminally fused glycosylation sequence, and codon-optimized <i>gtfA-gtfB</i> from <i>S. parasanguinis</i> FW213, and codon-optimized <i>lgtB</i> from <i>N. meningitidis</i> MC58                                                              | This study |
| pGlycoLoop-sfGFP-GtfAB-LgtB      | pACYCm carrying codon-optimized <i>sfGFP</i> with a N terminally fused hexahistidine tag and an internal loop fused glycosylation sequence, and codon-optimized <i>gtfA-gtfB</i> from <i>S. parasanguinis</i> FW213, and codon-optimized <i>lgtB</i> from <i>N. meningitidis</i> MC58                                                            | This study |
| pGlycoTag-sfGFP-GtfAB-LgtB-LgtA  | pACYCm carrying codon-optimized <i>sfGFP</i> with a N terminally fused hexahistidine tag and a C terminally fused glycosylation sequence, and codon-optimized <i>gtfA-gtfB</i> from <i>S. parasanguinis</i> FW213, and codon-optimized <i>lgtB</i> from <i>N. meningitidis</i> MC58, and codon-optimized <i>lgtA</i> from <i>H. pylori</i> J99   | This study |
| pGlycoLoop-sfGFP-GtfAB-LgtB-LgtA | pACYCm carrying codon-optimized <i>sfGFP</i> with a N terminally fused hexahistidine tag and an internal loop fused glycosylation sequence, and codon-optimized <i>gtfA-gtfB</i> from <i>S. parasanguinis</i> FW213, and codon-optimized <i>lgtB</i> from <i>N. meningitidis</i> MC58, and codon-optimized <i>lgtA</i> from <i>H. pylori</i> J99 | This study |
| pCDFm                            | pCDFDuet-1 derived plasmid, the original double T <sub>7</sub> region between EcoNI and XhoI site was replaced by a 1333-nucleotide fragment containing double Ptac promoters, rrnB_T1/T2 terminators, followed by the insertion of double multiple cloning sites between the promoter and terminator; CloDF13 ori Spec <sup>R</sup>             | This study |
| pCDFm-GalU-GalE                  | pCDFm carrying <i>galU</i> and <i>galE</i> from <i>E. coli</i>                                                                                                                                                                                                                                                                                   | This study |
| pCDFm-GalU-GalE-Pgm              | pCDFm carrying <i>galU</i> , <i>galE</i> and <i>pgm</i> from <i>E. coli</i>                                                                                                                                                                                                                                                                      | This study |
| pET28m                           | pET28a (+) derived plasmid, the original T <sub>7</sub> region between BglIII and XhoI site was replaced by a 1236-nucleotide fragment containing double Ptac promoter, rrnB_T1/T2 terminator; ColE ori Kan <sup>R</sup>                                                                                                                         | This study |
| pET28m-GlmS54                    | pET28m carrying codon-optimized <i>glmS*54</i> from <i>E. coli</i>                                                                                                                                                                                                                                                                               | This study |



|                         |                                                                                                                                             |            |
|-------------------------|---------------------------------------------------------------------------------------------------------------------------------------------|------------|
| pET28m-GlmS54-GlmM-GlmU | pET28m carrying codon-optimized <i>glmS*54</i> , <i>glmM</i> and <i>glmU</i> from <i>E. coli</i>                                            | This study |
| pKD4                    | <i>FRT-kan-FRT bla</i> R6K $\gamma$                                                                                                         | 1          |
| pKD46                   | <i>repA101(Ts) pSC101 bla araC P<sub>araBAD</sub>-exo, beta</i> and <i>gama</i>                                                             | 1          |
| pCas                    | <i>repA101(Ts) pSC101 kan P<sub>cas</sub>-cas9 P<sub>araBAD</sub>-exo, beta</i> and <i>gama lacI<sup>q</sup> P<sub>trc</sub>-sgRNA-pMB1</i> | 2          |
| pTarget                 | <i>pMB1 aadA</i>                                                                                                                            | 2          |
| pCP20                   | <i>repA101(Ts) pSC101 bla cat <math>\lambda</math> repressor (ts) FLP</i>                                                                   | 3          |

**Table S2 N20 sequences of gRNA used for CRISPR-Cas9 based genome editing used in this study.**

| Gene           | N20 Sequence at the 5' end of protospacer-adjacent motif (PAM) |
|----------------|----------------------------------------------------------------|
| <i>lacIZYA</i> | CGATGGTTTGCCCGGATAAA                                           |
| <i>zwf</i>     | GATCATGTGCGCATCTGAC                                            |
| <i>pfkA</i>    | TGAAACCCGCGCAACTGTGC                                           |
| <i>pfkB</i>    | AGTGCAGCCACACTCAATCA                                           |
| <i>nagB</i>    | CGAAATGCATAAAGCAGGCC                                           |
| <i>pykF</i>    | CACCGGCTTCTGCGGAGTC                                            |
| <i>pykA</i>    | TCCATGACTTCTGCACGCGT                                           |
| <i>gldA</i>    | TATTTGGCAACAGCAGATAG                                           |

## Materials and Methods

### Bacterial strains and growth conditions

The strains used in this study are listed in [Supplementary material Table S1](#). *E. coli* DH5 $\alpha$  was used for the maintenance and propagation of plasmids, while *E. coli* BL21(DE3) was applied to express CGL2 protein. Both DH5 $\alpha$  and BL21(DE3) were cultured at 37 °C in Luria-Bertani (LB) medium containing 10 g/L tryptone, 5 g/L yeast extract, and 10 g/L NaCl in shake flasks, or on LB plates. *E. coli* K-12 JM109 and established glycoengineered strain GO08 were used as hosts for the production of glycoprotein. Cultures were grown overnight in LB medium (20 mL) containing appropriate antibiotics to prepare a seed culture. Seed culture (1 mL) was re-inoculated into the production medium (100 mL) in a shake flask. Production was carried out with the modified M9 (M9Y) medium as described previously,<sup>4</sup> containing 20 g/L glycerol, 20 g/L glucose, 6 g/L Na<sub>2</sub>HPO<sub>4</sub>, 0.5 g/L NaCl, 3 g/L KH<sub>2</sub>PO<sub>4</sub>, 1 g/L NH<sub>4</sub>Cl, 1 mM MgSO<sub>4</sub>, 0.1 mM CaCl<sub>2</sub>, and 2 g/L yeast extract. When needed, 50 mg/L of kanamycin, 25 mg/L of chloramphenicol, and 50 mg/L of spectinomycin were supplemented. Cultures were grown at 37 °C to an absorbance at 600 nm (optical density OD<sub>600</sub>) of 0.6–0.8. Expression was induced by adding various concentrations (0.1 mM, 0.25 mM, 0.5 mM, 0.75 mM, and 1 mM) of inducer isopropyl  $\beta$ -D-1-thiogalactopyranoside

(IPTG). Cultures were grown for a further 12–72 h at various induction temperatures (16 °C, 20 °C, 28 °C, 34 °C, and 37 °C) in the presence of inducing agents.

### Plasmid construction

The plasmids and primers used in this study are listed in [Supplementary material Table S1](#). The vectors pACYCDuet-1, pCDFDuet-1, and pET28a(+) (Novagen) were used for expression of glycosylated superfolder green fluorescent protein (sfGFP), the precursor pathway, and CGL2 galectin, respectively. Molecular biology procedures followed standard protocols as described previously.<sup>5</sup>

The plasmid pACYCm was modified from pACYCDuet-1 by replacing the original T7 region between *Eco*NI and *Xho*I by an approximately 1000-nucleotide fragment containing double tac promoters, double rrnB terminators, and double multiple cloning sites. The sfGFP with an N-terminally fused hexahistidine tag, which incorporated the glycosylation sequence in a C-terminal tag or an internal loop (between residues 194 and 195), were codon-optimized and synthesized by General Biosystems (Anhui, China) and cloned into *Eco*NI and *Bam*HI of pACYCDuet-1 (Novagen) to remove native T7 promoters, resulting in pGlycoTag-sfGFP or pGlycoLoop-sfGFP. Subsequently, the *gtfA-gtfB* that initiates the first step of the protein glycosylation by transferring GlcNAc to the Ser residues of the protein backbone was derived from the genomic DNA of *S. parasanguinis* FW213 and synthesized after codon optimization. The gene was digested with *Bam*HI and *Eco*RI and ligated into the corresponding sites of pGlycoTag-sfGFP or pGlycoLoop-sfGFP. Then, the codon-optimized *lgtB* gene encoding  $\beta$ -1,4-galactosyltransferase from *N. meningitidis* MC58 was cut with *Sal*I and *Not*I and inserted into pGlycoTag-sfGFP-GtfAB or pGlycoLoop-sfGFP-GtfAB to obtain pGlycoTag-sfGFP-GtfAB-LgtB or pGlycoLoop-sfGFP-GtfAB-LgtB. Moreover, the codon-optimized *lgtA* gene encoding  $\beta$ -1,3-*N*-acetylglucosaminyltransferase from *H. pylori* J99 was digested with *Eco*RI and *Sal*I and inserted into pGlycoTag-sfGFP-GtfAB-LgtB or pGlycoLoop-sfGFP-GtfAB-LgtB, generating pGlycoTag-sfGFP-GtfAB-LgtB-LgtA or pGlycoLoop-sfGFP-

GtfAB-LgtB-LgtA, respectively. Each of the above-constructed open-reading frames was fused with a tac promoter, a ribosome-binding site, and an *rrnB* terminator operon.

For the expression of fungal galectin CGL2, the gene encoding the fungal galectin CGL2 from *Coprinus cinereus* was codon-optimized. The PCR product, incorporating an N-terminally fused hexahistidine tag was digested with *NdeI/NotI* and ligated to pET28a(+), resulting in the expression plasmid pET28a-CcCGL2.

The plasmid pCDFm was modified from pCDFDuet-1 by replacing double T7 promoters and one T7 terminator with double tac promoters and double *rrnB* terminators, followed by the insertion of double multiple cloning sites between the promoter and terminator. Genes *pgm*, *galU*, and *galE* were amplified from *E. coli*. First, *galU* and *galE* were fused by overlap-extension PCR, digested with *NdeI/NotI* and ligated to the second multiple cloning site, yielding pCDFm-GalU-GalE. Then, *pgm* was inserted between *EcoRI* and *HindIII* of the first multiple cloning site, generating pCDFm-GalU-GalE-Pgm.

The plasmid pET28m was modified from pET28a (+) by replacing the original T7 region between *BglII* and *XhoI* by an approximately 1000-nucleotide fragment containing double tac promoters, double *rrnB* terminators, and double multiple cloning sites between the promoter and terminator. Genes *glmM* and *glmU* were amplified from *E. coli*, and *glmS\*54* was codon-optimized and synthesized. First, *glmS\*54* was inserted into the first multiple cloning site between *EcoRI* and *HindIII*, generating pET28m-GlmS54. Then, polycistron *glmM* and *glmU*, with their intergenic region, were ligated to the second multiple cloning site *NdeI/NotI*, yielding pET28m-GlmS54-GlmM-GlmU. The correct insertion of all genes was verified by sequencing.

### **Construction of *E. coli* mutant strains by gene deletion**

Single gene deletion from the *E. coli* K-12 JM109 chromosome was performed using the CRISPR-Cas9 method, as described previously.<sup>6</sup> The pTarget series was constructed by assembling the pTarget backbone with a targeting N20 sequence of gene loci of interest and two homology arms. The pTarget backbone was amplified by

inverse PCR with the modified N20 sequence overhanging at the 5' ends of primers and 15–20 bp overlapping ends. The donor DNA with 500-bp homologous arms on each side was designed according to the sequence of the target gene and the location of the sgRNA. Two homology arms were separately amplified, fused together by overlap-extension PCR, and the resulting fragment also had overhangs with 15–20 bp overlapping ends. The pTarget backbone with a targeting N20 sequence and donor DNA was assembled using the Gibson assembly method. The designed sgRNAs targeting *zwf*, *pfkAB*, *pykFA*, *gldA*, *nagB*, and *lacIZYA* genes are shown in [Supplementary material Table S2](#).

JM109 was transformed by pCas, and 10 mM arabinose was added to induce the expression of  $\lambda$ -Red. Subsequently, electrocompetent cells were mixed with pTarget series DNA, suspended immediately in ice-cold LB medium (1 mL), recovered for 3 h at 30 °C before spreading onto LB agar plate containing kanamycin and spectinomycin, and incubated overnight at 30 °C. Transformants were verified by colony PCR and DNA sequencing. The pTarget plasmid was cured by transferring positive colonies into LB medium containing 0.5 mM IPTG to induce sgRNA expression of pCas and cultivating for 8–10 h at 30 °C. The pCas plasmid was eliminated by cultivating overnight at 42 °C. The cultures after plasmid curing were streaked, and the colonies were tested for kanamycin and spectinomycin sensitivity, and were verified using PCR and sequencing. The method was repeated to delete all candidate genes.

### **Analytical methods**

Cell growth was monitored by measuring OD<sub>600</sub>, which was then converted to dry cell weight (DCW) using a calibration curve. The concentrations of glycerol and glucose in the batch fermentations were quantified using high-performance liquid chromatography (HPLC) (Agilent 1200 Series) with a refractive index (RI) detector and an organic acid column (Phenomenex, Torrance, CA, USA). The column was eluted with 5 mM H<sub>2</sub>SO<sub>4</sub> at a constant flow rate of 0.6 mL/min at 50 °C. The concentration of glycoprotein was determined using a Pierce™ BCA Protein Assay Kit

(Thermo Scientific™, San Jose, CA, USA), according to the manufacturer's instructions.

## References

- 1 K. A. Datsenko and B. L. Wanner, *Proceedings of the National Academy of Sciences*, 2000, **97**, 6640-6645.
- 2 Y. Jiang, B. Chen, C. Duan, B. Sun, J. Yang and S. Yang, *Appl. Environ. Microbiol.*, 2015, **81**, 2506-2514.
- 3 P. P. Cherepanov and W. Wackernagel, *Gene*, 1995, **158**, 9-14.
- 4 Y. Wu, X. Sun, Y. Lin, X. Shen, Y. Yang, R. Jain, Q. Yuan and Y. Yan, *Metab. Eng.*, 2017, **39**, 1-8.
- 5 J. Sambrook and D. W. Russell, *Molecular cloning: a laboratory manual*, Cold Spring Harbor Laboratory Press, New York, 2001.
- 6 Y. Jiang, B. Chen, C. Duan, B. Sun, J. Yang and S. Yang, *Appl. Environ. Microbiol.*, 2015, **81**, 2506-2514.
